# Supplementary material
Source: PubMed Central journal article supplement (PMC7940596)
Supplement: NIHMS1671491-supplement-1671491_Supp_Material.pdf [file NIHMS1671491-supplement-1671491_Supp_Material.pdf]

## Electronic Supplementary Material

### **List of Type 1 Diabetes TrialNet Study Group members**

Steering Committee: C.J. Greenbaum (Benaroya Research Institute), M.A. Atkinson (University of Florida), D.A. Baidal (University of Miami), M. Battaglia (San Raffaele University), D. Becker (University of Pittsburgh), P. Bingley (University of Bristol), E. Bosi (San Raffaele University), J. Buckner (Benaroya Research Institute), M. Clements (The Children's Mercy Hospital), P. G. Colman (Walter & Eliza Hall Institute of Medical Research), L. DiMeglio (Indiana University), C.Evans-Molina (Indiana University), S.E. Gitelman (University of California, San Francisco), R. Goland (Columbia University), P. Gottlieb (Barbara Davis Center for Childhood Diabetes), K. Herold (Yale University), M. Knip (University of Helsinki), J.P. Krischer (University of South Florida), A.Lernmark (Skane University Hospital), W.Moore (The Children's Mercy Hospital), A. Moran (University of Minnesota), A.Muir (Emory Children's Center), J.Palmer (University of Washington), M.Peakman (King's College), L.Philipson (University of Chicago), P. Raskin (University of Texas Southwestern), M.Redondo (Baylor College of Medicine), H.Rodriguez (University of South Florida Diabetes and Endocrinology Center), W. Russell (Vanderbilt Eskind Diabetes Clinic), D.A. Schatz (University of Florida), J.M. Sosenko (University of Miami), L.Spain (National Institute of Diabetes and Digestive and Kidney Diseases [NIDDK]), J.Wentworth (Walter & Eliza Hall Institute of Medical Research), D. Wherrett (University of Toronto), D.M. Wilson (Stanford University), W.Winter (University of Florida), A.Ziegler (Technical University Munich). Past Members: M.Anderson (University of California, San Francisco), P. Antinozzi (Wake Forest University), R.Insel (Juvenile Diabetes Research Foundation [JDRF]), T.Kay (St. Vincent's Institute of

Medical Research), J.B. Marks (University of Miami), A.Pugliese (University of Miami), B. Roep (Leiden University Medical Center), J.S. Skyler (University of Miami), J.Toppari (Hospital District of Southwest Finland). Executive Committee: C.J. Greenbaum (Benaroya Research Institute), J.P. Krischer (University of South Florida), E.Leschek (National Institute of Diabetes and Digestive and Kidney Diseases [NIDDK]), L.Spain (National Institute of Diabetes and Digestive and Kidney Diseases [NIDDK]). Past Members: K.Bourcier (National Institute of Allergy and Infectious Diseases [NIAID]), R.Insel (Juvenile Diabetes Research Foundation [JDRF]), J.Ridge (National Institute of Allergy and Infectious Disease [NIAID]), J.S. Skyler (University of Miami). Chair's Office: C.J. Greenbaum (Benaroya Research Institute), L.Rafkin (University of Miami), J.M. Sosenko (University of Miami). Past Members: J.S. Skyler (University of Miami), I.Santiago (University of Miami). TrialNet Coordinating Center (University of South Florida): J.P. Krischer, B.Bundy, M. Abbondandolo, T. Adams, I.Asif, J.Bjellquist, M.Boonstra, C. Burroughs, M.Cleves, D.Cuthbertson, M.DeSalvatore, C.Eberhard, S.Fiske, J. Ford, J. Garmeson, S.Geyer, B.Hays, C.Henderson, M.Henry, K.Heyman, B. Hsiao, C. Karges, B.-G. Koziol, L.Lane, S. Liu, J. Lloyd, K. Maddox, J. Malloy, J. Martin, C. McNeill, M.Moore, S. Muller, T. Nguyen, J. Nunez, R. O'Donnell, M. Parker, MJ Pereyra, A.Roberts, K. Sadler, C. Sullivan, R.Tamura, E. Walker-Veras, M.V. Warnock, K. Wood, R. Wood, P. Xu, V. Yanek, K. Young. Past Members: D. Amado, A. Kinderman, A. Leinbach, J. Miller, N. Reed, T. Stavros. National Institute of Diabetes and Digestive and Kidney Diseases [NIDDK]: E. Leschek, L. Spain. Data Safety and Monitoring Board: E. Blumberg (University of Pennsylvania), S. Aas (Georgetown University), G. Beck (Cleveland Clinic Foundation), R. Gubitosi-Klug (Case Western Reserve University), L.

Laffel (Joslin Diabetes Center), R. Vigersky (Medtronic), D. Wallace (Research Triangle Institute). Past Members: D. Brillon (Cornell University), R. Veatch (Georgetown University). Infectious Disease Safety Committee: B. Loechelt (Children's National Medical Center), L. Baden (Brigham and Women's Hospital), P. Gottlieb (Barbara Davis Center for Childhood Diabetes), M. Green (University of Pittsburgh), E. Leschek (National Institute of Diabetes and Digestive and Kidney Diseases [NIDDK]), A. Weinberg (University of Colorado). Laboratory Directors: S. Marcovina (University of Washington), J.P. Palmer (University of Washington), J. Tischfield (Rutgers University), A. Weinberg (University of Colorado), W. Winter (University of Florida), L. Yu (Barbara Davis Center for Childhood Diabetes). TrialNet Clinical Network Hub (Benaroya Research Institute): A. Shultz, E. Batts, A. Pagryzinski, M. Ramey, M. Tobin. Past Members: K. Fitzpatrick, R. Guerra, M. Romasco, C. Webb. Active Personnel at Clinical Centers Participating in the TN01 Protocol: Barbara Davis Center for Childhood Diabetes, Aurora, Colorado: A. K. Steck, J. Albery, B. Bradfield, L. Chesshir, P. A. Gottlieb, A. W. Michels, M. J. Rewers, K. Simmons, M. VanDyke. Baylor College of Medicine, Houston, Texas: M. J. Redondo, M. Pietropaolo, S. Pietropaolo, M. Tosur. Benaroya Research Institute, Seattle, Washington: C. J. Greenbaum, J. H. Buckner, W. Hao, S. Lord, M. McCulloch-Olson, M. Ramey, E. Sachter, J. Snavely, M. Tobin, C. Tordillos, D. VanBuecken, N. Wickstrom. The Children's Mercy Hospital, Kansas City, Missouri: W. Moore, M. Beidelschies, D. Brenson-Hughes, J. Boyd, J. Cernich, M. Clements, J. Dolan, A. Elrod, E. Haith, K. Halpin, J. James, T. Luetjen, C. McClain, R. McDonough, S. Mitchell, F. A.I. Muhaisen, S. Orlich, E. Paprocki, B. Seufferling, J. Sexton, J. Slover. Columbia University, New York, New York: R. Goland, A. Alvarez, M. Bogun, R. Gandica, S. Pollak, K. Williams. Emory Children's

Center, Atlanta, Georgia: A. Muir, A. Antich, K. Cossen, E. Felner, M. Jenkins, L. Panagiotakopoulos, B. Powell-Lee, W. Sanchez. The Hospital for Sick Children, Toronto, Ontario: D.K. Wherrett, D. Dias, L. Eisel, R. Kovalakovska, B. Perro, M. J. Ricci. Indiana University, Indianapolis, Indiana: L. A. DiMeglio, C. Evans-Molina, E. Grubbs, M. Hildinger, H. M. Ismail, M. Legge, A. Newnum, J. Sanchez, E. K. Sims, M. Spall, M. Tebbe, S. Woerner. San Raffaele Hospital, Milan, Italy: E. Bosi, M. Battaglia, E. Bianconi, A. Bolla, R. Bonfanti, A. Caretto, G. Frontino, P. Grogan, A. Laurenzi, C. Molinari, M. Pastore, A. Petrelli. Skane University Hospital, Scania, Sweden: Å. Lernmark, L. Ahlkvist, H. Borg, B. Jónsdóttir, A. Katsarou, J. Å. Kördel, H. Larsson, M. Lundgren, U. Ulvenhag. Stanford University, Stanford, California: D. M. Wilson, N. Arrizon-Ruiz, T. Aye, L. Bachrach, T. Esrey, L. Nally. Technical University Munich, Munich, Germany: A. Ziegler, P. Achenbach, M. Bunk, M. Herbst, J. Hirte, A. Hofelich, V. Hoffmann, M. Kroetz, C. Ramminger, F. Reinmüller, K. Warncke, T. Welzhofer. University of Bristol, Bristol, England: C. Anderson, P. Bingley, T. Hughes, V. King, Y. Liu, S. Loud, B. Thorne, B. Wilson. University of California, San Francisco, California: S.E. Gitelman, F. Abdulhussein, M. S. Anderson, G. Auerback, J. Buchanan, H. Chesser, A. Erkin-Cakmak, C. T. Ferrara, A. Huang, K. Ko, J. Lee, R. Long, S. Sanda, C. Schulmeister, S. K. Selling, C. Torok, R. Wesch, J. Wong. University of Chicago, Chicago, Illinois: L. Philipson, D. Deplewski, G. Gannon, S. Greeley, L. Jones, H. Kolluri, M. Lemelman, C. Miles, M. Miller, R. Naylor, K. O'Sullivan, M. Pusinelli, S. Tucker, C. Yu. University of Florida, Gainesville, Florida: D. A. Schatz, A. Abraham, J. Adams, A. Albanese-O'Neill, M. A. Atkinson, B. Bruggeman, T. M. Brusko, M. J. Claire-Salzler, K. Dayton, M. J. Haller, P. Hiers, J. Hosford, L. M. Jacobsen, J. Marks, H. Rohrs, J. Silverstein, P. Towe, W. E.

Winter, C. Zimmerman. University of Helsinki, Helsinki, Finland: M. Knip, M. Hirvasniemi, K. Koski, K. Luopajarvi, H. Siljander, R. Veijola. University of Miami, Miami, Florida: D. A. Baidal, C. Blaschke, D. Matheson, J. Sanchez, N. Sanders-Branca, J. S. Skyler, J. M. Sosenko. University of Minnesota, Minneapolis, Minnesota: A. M. Moran, M. D. Bellin, J. Leschyshyn, J. McVean, B. M. Nathan, B. Nelson, B. Pappenfus, J. Ruedy, A. Street, D. Weingartner. University of Pittsburgh, Pittsburgh, Pennsylvania: D. J. Becker, K. DeLallo, D. Groscost, M. B. Klein, I. M. Libman, K. Riley, F. Toledo. University of Texas Southwestern, Dallas, Texas: P. Raskin, L. Boyles. University of South Florida Diabetes and Endocrinology Center, Tampa, Florida: H. Rodriguez, C. Alverex, S. Bollepalli, J. Brown, R. Brownstein, A. Castro, E. Eyth, M. Feldman, R. Franks, D. Gomez, L. Guerra, C. Jacovino, V. Jorgensen, B. Moran, H. Navarte, A. Oxner, D. Shulman. Vanderbilt Eskind Diabetes Clinic, Nashville, Tennessee: W. E. Russell, F. Brendle, A. Brown, B. Hammel, J. Leshko, D. J. Moore, K. Rainer, T. Smith, J. W. Thomas, G. Williams, S. Wright. Walter and Eliza Hall Institute of Medical Research, Parkville, Victoria: P. Colman, Marika Bjoransen, Spiros Furlanos, L.C. Harrison, F. Healy, L. Redl, J.M. Wentworth. Yale University, New Haven, Connecticut: K. C. Herold, L. Feldman, R. Sherwin, W.V. Tamborlane, S.A. Weinzimer.
